# Supplementary material for: Gamification in Stress Management Apps: A Critical App Review
Source: PubMed Central journal article supplement (PMC5480012; doi:10.2196/games.7216), 2017-06-07
Supplement: games_v5i2e13_app1.pdf [file games_v5i2e13_app1.pdf]

| <b>App name</b>                | <b>App provider</b>    | <b>Gamification technique score</b> |
|--------------------------------|------------------------|-------------------------------------|
| 101 Ways to Be Healthy         | Life Time Fitness      | 0                                   |
| 3 Minute Stress Buster         | Astute Software        | 0                                   |
| 5 Best Health Tips             | Eurekafox              | 0                                   |
| Anti Stress                    | reism                  | 0                                   |
| Anti-Stress-                   | Aps Studios            | 0                                   |
| Anti-stress Exercise           | QUO?TE developers      | 0                                   |
| Best Guided Meditation         | Muhhas                 | 0                                   |
| Best Self-Help Quotes          | Waikiki Sky            | 0                                   |
| Best Wisdom Quotes             | Waikiki Sky            | 0                                   |
| Beste entspannende Musik       | Aps Studios            | 0                                   |
| Dance Workout                  | Marinapps              | 0                                   |
| Der Klang der regen            | Aps Studios            | 0                                   |
| Dr Yousef                      | Mobile App Company     | 0                                   |
| EFT Tapping Simulation         | Mikhail Game Tech      | 0                                   |
| Entspannende Musik             | Aps Studios            | 0                                   |
| Entspannungsmusik              | Aps Studios            | 0                                   |
| Essential Oils for Stress      | Almasi                 | 0                                   |
| Exercise - A Necessity         | ACIW                   | 0                                   |
| Free Meditation - Take a Break | Meditation Oasis       | 0                                   |
| Get Out of Stress              | AndroAppDevelopers     | 0                                   |
| Health Foods Now               | TopFreeAppsTips        | 0                                   |
| Meditation Music               | MeTapps                | 0                                   |
| Motivational Quotes            | Waikiki Sky            | 0                                   |
| Motivational Quotes for Stress | Tiger Shark Pendekar   | 0                                   |
| Natural Stress Relief Hypnosis | Mastermind App         | 0                                   |
| Preksha Meditation*            | Preksha International  | 0                                   |
| Regen ton                      | Aps Studios            | 0                                   |
| Regen und Donner Geräusche     | Aps Studios            | 0                                   |
| Reiki Heal                     | Devils Canon           | 0                                   |
| Social BrainGym Lite           | Brain Relax Technosoft | 0                                   |
| Stress Flush                   | ENKI                   | 0                                   |
| Stress Free Live Free          | Davidandroidbro        | 0                                   |

| <b>App name</b>                | <b>App provider</b>       | <b>Gamification technique score</b> |
|--------------------------------|---------------------------|-------------------------------------|
| Stress Management              | EclipseBoy                | 0                                   |
| Stress Reduction Audio         | Mindware Consulting, Inc  | 0                                   |
| Stress Relief Free Guide       | AppBelle                  | 0                                   |
| Stress Relief Hypnosis         | Shoonger                  | 0                                   |
| stress relief reduce tensions  | malcolm pugh              | 0                                   |
| Stressheads                    | YouthNet                  | 0                                   |
| Sun Anywhere                   | Deux                      | 0                                   |
| Tiefe Meditation Musik         | Aps Studios               | 0                                   |
| Wellen strand klingen          | Aps Studios               | 0                                   |
| WorkLIFE 365                   | Lindsey Witmer Collins    | 0                                   |
| AnandaYoga                     | ECHK Hong Kong            | 1                                   |
| Breathe2Relax                  | T2                        | 1                                   |
| Calm-IT Stress Relief          | New Oceans                | 1                                   |
| eSense Temperature             | Mindfield Biosystems Ltd. | 1                                   |
| INNOVZEN                       | INNOVZEN                  | 1                                   |
| O2CHAIR                        | INNOVZEN                  | 1                                   |
| POP POP                        | BIGTEXAPPS                | 1                                   |
| Reiki-Energie                  | Dog Breeds Apps           | 1                                   |
| Stress Check                   | kzk                       | 1                                   |
| Stress Management              | Nasim                     | 1                                   |
| Stress Zapper                  | Green Infinity            | 1                                   |
| The Stress Surfer              | Workforce Management tems | 1                                   |
| Baoding Stress                 | GaMoon                    | 2                                   |
| Luftpolsterfolie - Stressabbau | ExaMobile S.A.            | 2                                   |
| Mevii                          | Thrive 4-7                | 2                                   |
| Pocket Clarity: Mindfulness    | Three Pound               | 2                                   |
| RELAXATION OPTIMIZER           | IntelaText                | 2                                   |
| Stress Check by Azumio         | Azumio Inc.               | 2                                   |
| Stress Management Guide        | DHMobiApp                 | 2                                   |
| StressLocator Free             | Happy Electronics, s.r.o. | 2                                   |
